# Supplementary material
Source: PubMed Central journal article supplement (PMC7506220)
Supplement: lic-0009-0382-s01.pdf [file lic-0009-0382-s01.pdf]

**Supplementary Table 1. Correspondence table between Inuyama classification and a term of “encephalopathy” according to the Common Terminology Criteria for Adverse Events (version 4.0)**

| Inuyama classification |                                                                                                                |                                                                                                                       | CTCAE (Ver 4.0) (a term of “encephalopathy”) |                                                              |
|------------------------|----------------------------------------------------------------------------------------------------------------|-----------------------------------------------------------------------------------------------------------------------|----------------------------------------------|--------------------------------------------------------------|
| Grade of coma          | Psychiatric disorders                                                                                          | Reference items                                                                                                       | Grade                                        | Definition                                                   |
| I                      | Inversion of sleep pattern                                                                                     | Recognized retrospectively in most cases                                                                              | 1                                            | Mild symptoms                                                |
|                        | Euphoria and/or occasional depression                                                                          |                                                                                                                       |                                              |                                                              |
|                        | Negligent attitude with shortened attention span                                                               |                                                                                                                       |                                              |                                                              |
| II                     | Disorientation of time or place and confusion                                                                  | Excitation state and, urinary and fecal incontinence are absent, but flapping tremor is found on physical examination | 2                                            | Moderate symptoms; limiting instrumental ADL                 |
|                        | Inappropriate behaviors, such as throwing away money or discarding items of value                              |                                                                                                                       |                                              |                                                              |
|                        | Occasional somnolent tendency; able to open eyes and respond appropriately to questions                        |                                                                                                                       | 3                                            | Severe symptoms; limiting self-care ADL                      |
|                        | Makes impolite remarks, but follows doctors’ instructions                                                      |                                                                                                                       |                                              |                                                              |
| III                    | State of excitation and/or delirium, showing defiant behavior                                                  | Flapping tremor is observed, and the extent of disorientation is severe                                               | 3                                            | Severe symptoms; limiting self-care ADL                      |
|                        | Somnolent tendency; sleeping most of the time                                                                  |                                                                                                                       |                                              |                                                              |
|                        | Opens eyes in response to stimulation, but cannot follow the instructions of doctors, except for simple orders |                                                                                                                       |                                              |                                                              |
| IV                     | Coma; complete loss of consciousness                                                                           | Brushes off doctor’s hands if touched and/or frowns in response to stimuli                                            | 4                                            | Life-threatening consequences; urgent intervention indicated |
|                        | Response to painful stimuli                                                                                    |                                                                                                                       |                                              |                                                              |
| V                      | Deep coma                                                                                                      |                                                                                                                       |                                              |                                                              |
|                        | No response to painful stimuli                                                                                 |                                                                                                                       |                                              |                                                              |
| -                      |                                                                                                                |                                                                                                                       | 5                                            | Death                                                        |

Abbreviation: CTCAE, Common Terminology Criteria for Adverse Events.

**Supplementary Table 2. Advanced hepatocellular carcinoma patients who had hepatic encephalopathy during lenvatinib treatments**

| <b>Cases</b> | <b>Age</b> | <b>Body weight (kg)</b> | <b>Child-Pugh score</b> | <b>Starting dose</b> | <b>P-S shunt</b> | <b>Best response (mRECIST)</b> |
|--------------|------------|-------------------------|-------------------------|----------------------|------------------|--------------------------------|
| <b>1</b>     | 80         | 53                      | 5                       | 8                    | +                | PR                             |
| <b>2</b>     | 78         | 68                      | 5                       | 12                   | –                | SD                             |
| <b>3</b>     | 81         | 53                      | 6                       | 8                    | +                | PR                             |
| <b>4</b>     | 83         | 40                      | 6                       | 8                    | +                | PR                             |
| <b>5</b>     | 83         | 50                      | 6                       | 8                    | +                | SD                             |
| <b>6</b>     | 72         | 69                      | 6                       | 8                    | +                | SD                             |
| <b>7</b>     | 64         | 84                      | 6                       | 8                    | +                | SD                             |
| <b>8</b>     | 67         | 46                      | 6                       | 8                    | +                | SD                             |
| <b>9</b>     | 72         | 66                      | 6                       | 12                   | +                | PD                             |
| <b>10</b>    | 71         | 58                      | 6                       | 4                    | +                | PD                             |
| <b>11</b>    | 85         | 61                      | 6                       | 4                    | +                | PD                             |
| <b>12</b>    | 65         | 48                      | 6                       | 8                    | +                | NE                             |
| <b>13</b>    | 73         | 57                      | 6                       | 8                    | –                | SD                             |
| <b>14</b>    | 82         | 58                      | 6                       | 8                    | –                | NE                             |
| <b>15</b>    | 69         | 83                      | 7                       | 8                    | +                | PR                             |
| <b>16</b>    | 72         | 80                      | 7                       | 8                    | +                | SD                             |
| <b>17</b>    | 79         | 71                      | 7                       | 8                    | +                | PD                             |
| <b>18</b>    | 71         | 61                      | 7                       | 8                    | –                | PD                             |
| <b>19</b>    | 65         | 62                      | 8                       | 12                   | +                | PR                             |
| <b>20</b>    | 84         | 70                      | 8                       | 8                    | +                | SD                             |
